# Supplementary material
Source: HighWire-hosted journal article supplement (https://jnm.snmjournals.org/highwire/filestream/93902/field_highwire_adjunct_files/2/42838SupplementalFigureLegend.pdf)
Supplement: 42838SupplementalFigureLegend.pdf [file 42838SupplementalFigureLegend.pdf]

**Supplemental Figure 1.** Immunostaining and fluorescence-activated cell sorting (FACS) analysis of human (left) and porcine (right) circulating progenitor cells (CPC). (A and D) Isolectin IB<sub>4</sub> staining. (B and E) Dil-Labeled acetylated low-density-lipoprotein staining. (C and F) Combined isolectin IB<sub>4</sub> and Dil-labeled acetylated low-density-lipoprotein immunostaining. FACS analysis shows cell expression of Flk-1, vWF, eNOS, CD31, and CD105 antigens (open histograms) in human and porcine CPC. Filled histograms represent the isotype-matched control antibody.
